# Supplementary material for: Can Neonatal Systemic Inflammation and Hypoxia Yield a Cerebral Palsy-Like Phenotype in Periadolescent Mice?
Source: PubMed Central journal article supplement (PMC6728419; doi:10.1007/s12035-019-1548-8), 2019-04-02
Supplement: 12035_2019_1548_MOESM7_ESM.pdf [file 12035_2019_1548_MOESM7_ESM.pdf]

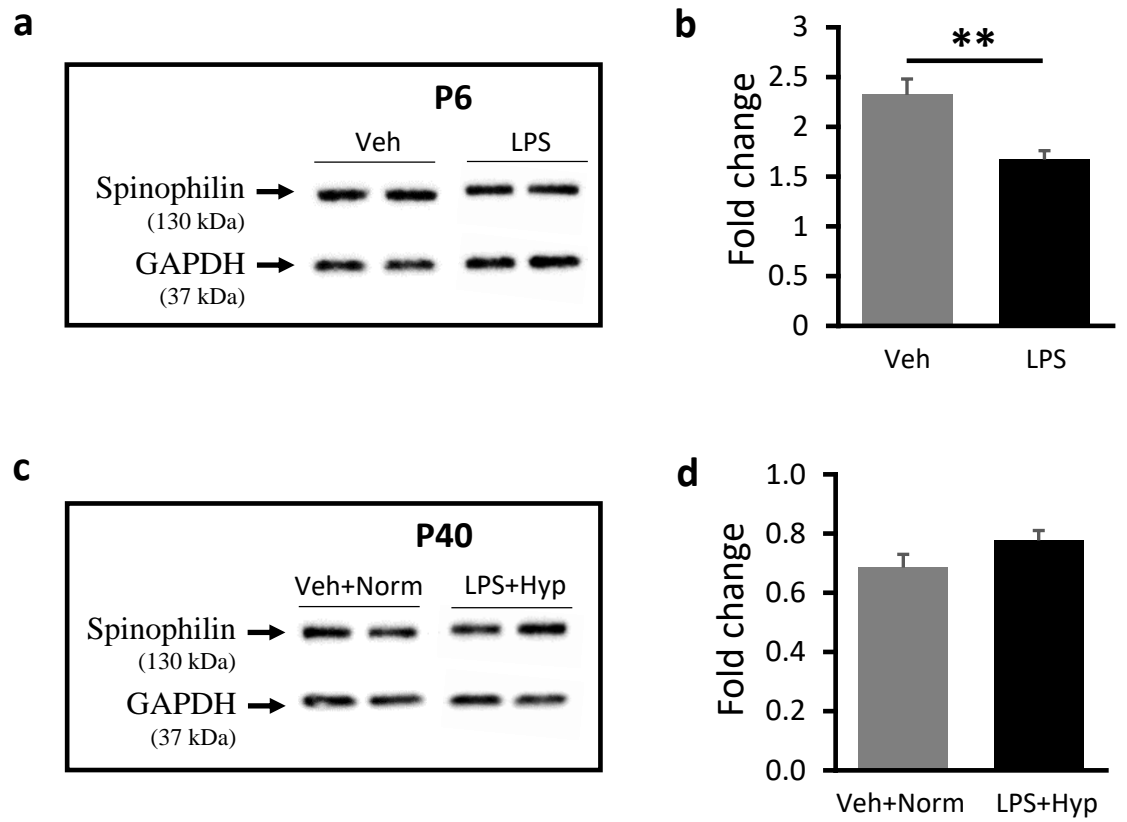

Supplementary Figure 1
